# Supplementary material for: PACE4-Based Molecular Targeting of Prostate Cancer Using an Engineered 64Cu-Radiolabeled Peptide Inhibitor
Source: PubMed Central journal article supplement — Neoplasia. 2014 Sep 10;16(8):634–43. doi: 10.1016/j.neo.2014.07.010 (PMC4235008; doi:10.1016/j.neo.2014.07.010), 2014-09-10
Supplement: mmc1.pdf [file mmc1.pdf]

## Supplementary information

**Table S1.** Physicochemical properties of the presented peptide.

| Analogue                                        | HPLC (T <sub>R</sub> ) <sup>a</sup> | [M + H <sup>+</sup> ] |          | HR-MS                |                      |
|-------------------------------------------------|-------------------------------------|-----------------------|----------|----------------------|----------------------|
|                                                 |                                     | calculated            | Obtained | (M+2H) <sup>2+</sup> | (M+3H) <sup>3+</sup> |
| NOTA(OH) <sub>2</sub> -LLLLRVKR-NH <sub>2</sub> | 6,960                               | 1294,63               | 1294     | 647,94               | 432,30               |

Footnotes:

<sup>a</sup> linear gradient from 2 to 35% of ACN 0,1% TFA in 0.1% aqueous TFA in 8 min followed by 35 to 100% in 6 min ,

Eclipse plus C18 column. 1.8 μm, 3 x 50 mm. with a flow of 0.4 mL/min.
